# Supplementary material
Source: HighWire-hosted journal article supplement (https://www.cmaj.ca/highwire/filestream/58166/field_highwire_adjunct_files/0/canada-wilson-appendix_1.pdf)
Supplement: canada-wilson-appendix_1.pdf [file canada-wilson-appendix_1.pdf]

**Appendix 1:** Decision instrument for the assessment and notification of events that may constitute a public health emergency of international concern.

Reprinted, with permission, from: *Fifty-eighth World Health Assembly resolution WHA58.3: Revision of the International Health Regulations*. Geneva: World Health Organization; 2005. Annex 2. p. 45. Available: [www.who.int/gb/ebwha/pdf\\_files/WHA58/A58\\_4-en.pdf](http://www.who.int/gb/ebwha/pdf_files/WHA58/A58_4-en.pdf)

A58/4

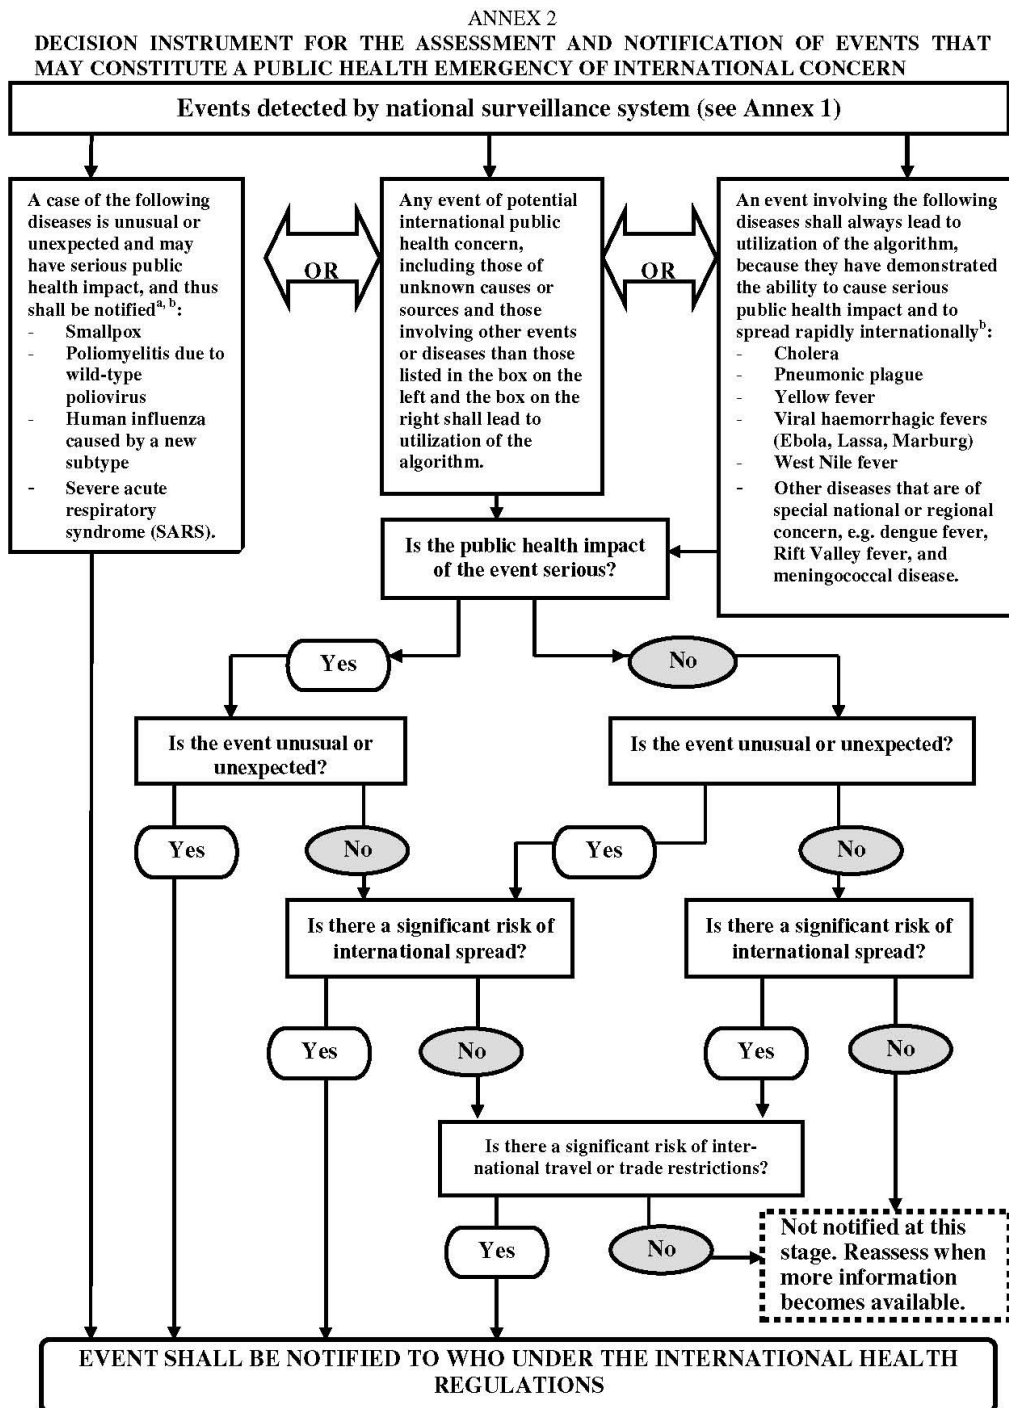

<sup>a</sup> As per WHO case definitions.

<sup>b</sup> The disease list shall be used only for the purposes of these Regulations.
